# Supplementary material for: Bazedoxifene inhibits sustained STAT3 activation and increases survival in GBM
Source: PubMed Central journal article supplement — Transl Oncol. 2021 Aug 5;14(11):101192. doi: 10.1016/j.tranon.2021.101192 (PMC8353354; doi:10.1016/j.tranon.2021.101192), 2021-08-05
Supplement: mmc1.pdf [file mmc1.pdf]

Supplemental Information

**Supplemental Table 1:** Glioma stem-like cell media recipe

| Component             | Volume or Concentration used | Company                                                                        | Product number |
|-----------------------|------------------------------|--------------------------------------------------------------------------------|----------------|
| Neurobasal media      | Base media                   | Invitrogen                                                                     | 12348017       |
| Recombinant human FGF | 10 ng/mL                     | Peprotech                                                                      | AF-100-18B     |
| Recombinant human EGF | 10 ng/mL                     | Peprotech                                                                      | AF-100-15      |
| B27                   | 10 mL                        | Obtained from the Cleveland Clinic Lerner Research Institute Cell Culture Core |                |
| L- glutamine          | 2 mmol/L                     |                                                                                |                |
| Sodium Pyruvate       | 1 mmol/L                     |                                                                                |                |

**Supplemental Table 2:** Primary antibody information for Western Analysis

| Target (sample species) | Company        | Product number | Dilution used      |
|-------------------------|----------------|----------------|--------------------|
| pY705 STAT3 (human)     | Cell signaling | 9145           | 1:1000 in 5% BSA   |
| pY705 STAT3 (mouse)     | abcam          | ab76315        | 1:10,000 in 5% BSA |
| STAT3 (human and mouse) | Cell signaling | 30835          | 1:1000 in 5% BSA   |
| Actin (human)           | Sigma          | A5316          | 1:5000 in 5% NFDm  |
| Actin (mouse)           | Cell signaling | 3700           | 1:2000 in 5% BSA   |
| GAPDH                   | Santa Cruz     | Sc-47724       | 1:2000 in 5% NFDm  |
| gp130                   | Cell signaling | 3732           | 1:500 in 5% BSA    |
| Myc                     | Abclonal       | AE070          | 1:500 in 5% BSA    |
| SOX2 (mouse)            | Invitrogen     | MA1-014        | 1:1000 in 5% BSA   |

**Supplemental Table 3:** qPCR primer sequences

| Human qPCR primers |                           |                            |
|--------------------|---------------------------|----------------------------|
| Target             | Forward primer (5' to 3') | Reverse primer (5' to 3')  |
| 18S                | GCTTAATTTGACTCAACACGGGA   | AGCTATCAATCTGTCAATCCTGTC   |
| SOX2               | CACACTGCCCTCTCAC          | TCCATGCTGTTTCTTACTCTCC     |
| OCT4               | TCTCCCATGCATTCAAAGTGG     | CCTTTGTGTTCCCAATTCCTTC     |
| NES                | CTGCTACCCTTGAGACACCTG     | GGGCTCTGATCTCTGCATCTAC     |
| Mouse qPCR primers |                           |                            |
| Target             | Forward primer (5' to 3') | Reverse primer (5' to 3')  |
| 18S                | GATCCATTGGAGGGCAAGTCT     | CCAAGATCCAACACTACGAGCTTTTT |
| SOX2               | AAGGGTTCTTGCTGGGTTTT      | AGACCACGAAAACGGTCTTG       |
| OCT4               | TGTTCCAGCCAGACCACCATC     | GCTTCCTCCACCCACTTCTC       |
| NES                | AGCAGGTGAACAAGACTCCG      | TTGGGTCCTCTAGCCCTACC       |

**Supplemental Table 4:** GSCs are sensitive to BZA treatment *in vitro*.

| Model:               | L1   | L2    | GL261 | mAstro |
|----------------------|------|-------|-------|--------|
| Bazedoxifene (gp130) | 0.67 | 0.452 | 4.12  | 4.37   |
| Ruxolitinib (JAK1/2) | NA   | NA    | 15.4  | NA     |
| WP1066 (JAK2/STAT3)  | 3.65 | 4.79  | 6.59  | 4.05   |
| STATTIC (STAT3-SH2)  | 9.00 | 11.53 | 8.06  | 7.23   |

**Supplemental table 4:** Cells were treated with IL-6/STAT3 pathway inhibitors: BZA (targets gp130), Ruxolitinib (targets JAK1/2), WP1066 (targets JAK2/STAT3), and STATTIC (targets STAT3-SH2 domain). Cells were treated with one of the inhibitors for 72 hours before a MTT assay was performed. MTT measures the metabolic activity of a cell and was used to indirectly measure cell viability. The table shows the calculated IC<sub>50</sub> concentrations (μM). Calculations were done using AAT BioQuest calculator (<https://www.aatbio.com/tools/ic50-calculator>)

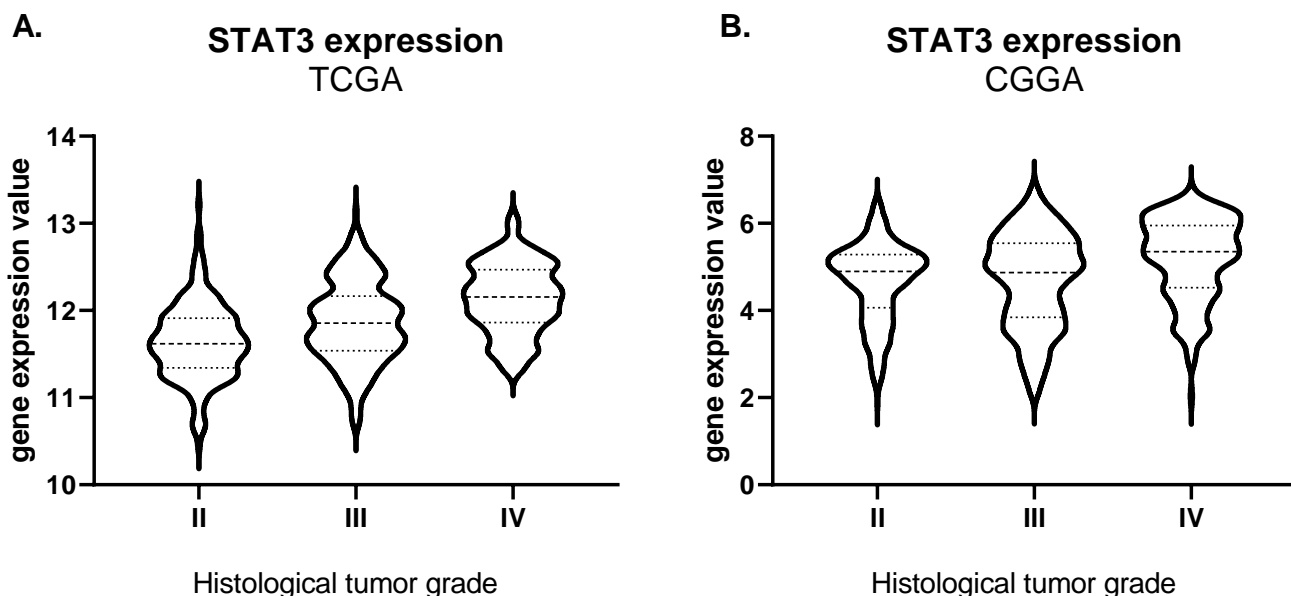

**Supplemental Fig 1. High-grade gliomas show high expression of STAT3.** Patient data exported from TCGA (A) or CGGA (B) was plotted for STAT3 expression, based on the tumor grade. STAT3 levels, reported as mRNA expression, were measured by using an HG-U133A array in the TCGA set or through RNA sequencing in the CGGA data set.

### Weight change with daily BZA treatment

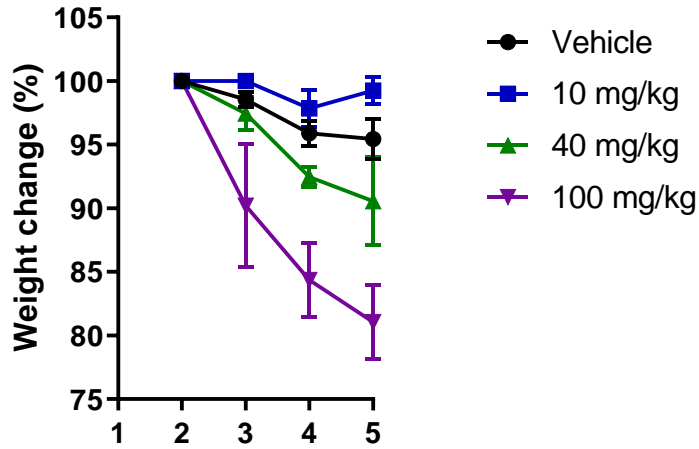

**Supplemental Fig 2. Daily treatment of BZA at high doses cause weight loss in our mouse model.** The percent weight change is shown from the experiment described in fig 6A.

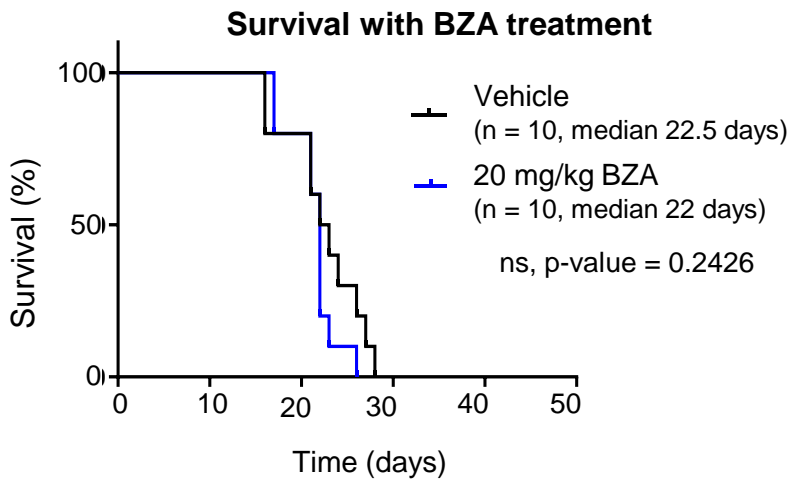

**Supplemental Fig 3. Low dose BZA treatment does not show a difference survival advantage.** Survival curve of 20 mg/kg BZA treatment compared to vehicle. Experimental design is described in fig. 6C.
